# Supplementary material
Source: PubMed Central journal article supplement (PMC2529027)
Supplement: 0803386105_0803386105SI.pdf [file 0803386105_0803386105SI.pdf]

# Supporting Information

O'Connor et al. 10.1073/pnas.0803386105

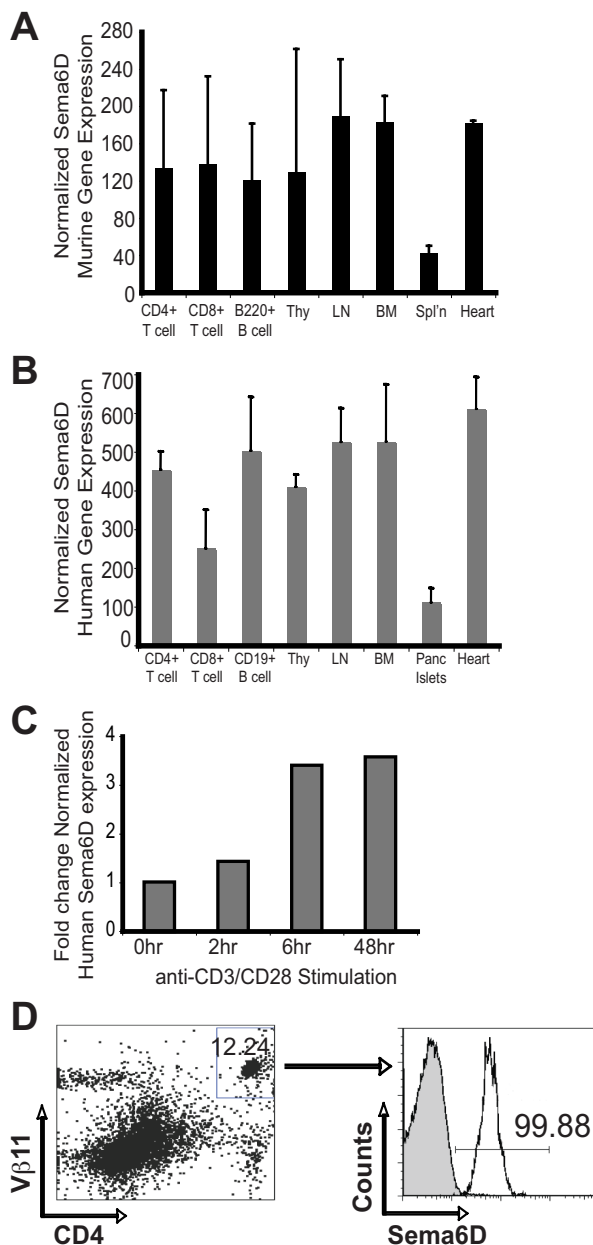

**Fig. S1.** Semaphorin 6D (Sema6D) expression is enhanced by activation. (A–C) Analysis of public database for T cell expression of Sema6D. (A) SymAtlas gene array mouse cell and tissue expression of Sema6D mRNA (1, 2). (B) SymAtlas gene array human cell and tissue expression of Sema6D mRNA (1, 2). (A and B) Thy, thymus; LN, lymph node; BM, bone marrow; Spl'n, spleen; Panc Islets, pancreatic islets. (C) Public gene array data for Sema6D mRNA expression in anti-CD3- and anti-CD28-stimulated T cells (3). (D) MOG-specific 2D2 Vβ11<sup>+</sup> TCR Tg CD4<sup>+</sup> T cells were stimulated *in vitro* for 4 days for Sema6D expression analysis. Sema6D induction was analyzed by flow cytometry.

1. Su AI, et al. (2002) Large-scale analysis of the human and mouse transcriptomes. *Proc Natl Acad Sci USA* 99:4465–4470.
2. Su AI, et al. (2004) A gene atlas of the mouse and human protein-encoding transcriptomes. *Proc Natl Acad Sci USA* 101:6062–6067.
3. Lund R, Aittokallio T, Nevalainen O, Lahesmaa R (2003) Identification of novel genes regulated by IL-12, IL-4, or TGF-β during the early polarization of CD4<sup>+</sup> lymphocytes. *J Immunol* 171:5328–5336.
4. Eun SY, et al. (2006) Cutting edge: Rho activation and actin polarization are dependent on plexin-A1 in dendritic cells. *J Immunol* 177:4271–4275.

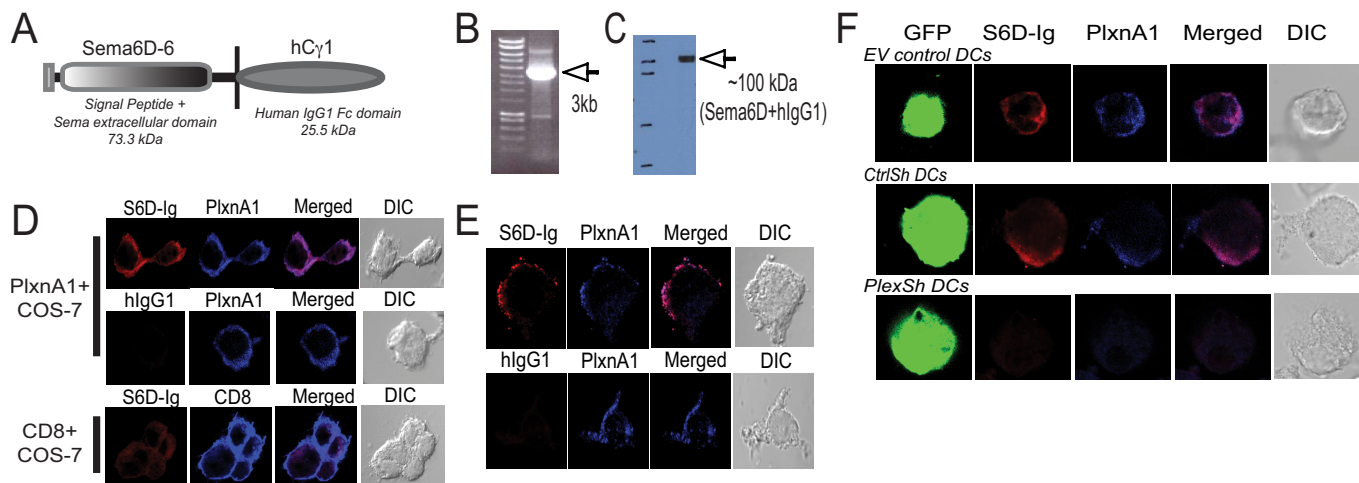

**Fig. S2.** Detection of Sema6D-Ig fusion protein colocalization with PlxnA1 via confocal microscopy. (A) The extracellular portion of Sema6D was fused with the Fc portion of human IgG1 in the pcDNA3 backbone. (B) A 3-kb piece of cDNA encoding Sema6D isoform 6 (S6D-6) was isolated from mouse brain RNA by RT-PCR. (C) Expression of Sema6D-Ig (100 kDa) from drug-selected Chinese hamster ovary stable cell lines was confirmed by Western blotting. (D) COS-7 cells were transfected with either a PlxnA1- or CD8a-expression plasmid and then incubated with biotin-conjugated Sema6D-Ig fusion protein (S6D-Ig). Biotin-Sema6D-Ig was detected by streptavidin (SA)-conjugated Alexa Fluor 555 (red). PlxnA1 was detected by staining with anti-PlxnA1 rabbit polyclonal Ab (Abcam) followed by Alexa Fluor 647-conjugated anti-rabbit Ig (blue). CD8 was detected with an anti-CD8a mAb followed by anti-mouse Alexa647. Purple color demonstrates colocalization of biotin-S6D-Ig with PlxnA1. (E) PlxnA1-expressing mouse DCs cultured for 12 days were incubated with biotin-S6D-Ig or control human IgG followed by the staining procedure described in D. (F) To confirm that PlxnA1 expression by DCs was necessary for Sema6D-Ig association, we used a small hairpin RNA (shRNA) to reduce PlxnA1 expression as described in ref. 4. DCs transduced with an empty retroviral control (EV), a retrovirus containing a mutated shRNA (CtrlSh), or a retrovirus bearing shRNA for PlxnA1 (PlexSh) were used in a localization assay with Sema6D-Ig. The staining protocol is identical to the one described in D. Purple color demonstrates that the red signal for biotin-S6D-Ig colocalized with the blue signal for PlxnA1. A reduction in PlxnA1 expression correlated with a reduced capacity of Sema6D-Ig to associate with DCs.



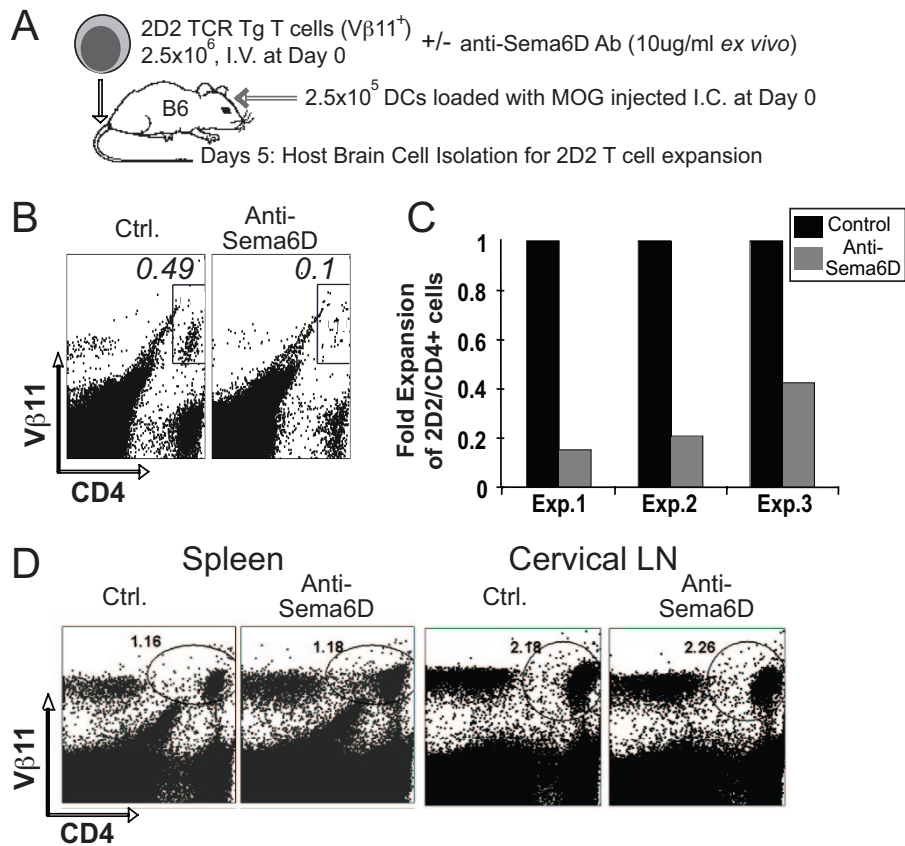

**Fig. S4.** Disruption of Sema6D with an anti-Sema6D antibody reduces T cell neuroinflammation. (A) MOG-specific 2D2 TCR Tg  $CD4^+$  T cells were stimulated *in vitro* for 4 days to induce Sema6D expression (Fig. S1D). At day 4 of *in vitro* stimulation, T cells were treated with a monoclonal anti-Sema6D Ab (R&D Systems) at a final concentration of  $10 \mu\text{g/ml}$  for 24 h. After treatment,  $\approx 2.5 \times 10^6$  T cells were adoptively transferred to recipient mice by i.v. injection. At the same time,  $\approx 2.5 \times 10^5$  DCs loaded with MOG antigen were transferred by intracranial (I.C.) injection. Five days after the adoptive transfer, the brain cells of recipient mice were isolated and analyzed by flow cytometry. (B) The expansion of 2D2  $CD4^+$  T cells was tracked by expression of the Tg  $V\beta 11$  TCR chain. The percentage of  $V\beta 11^+$   $CD4^+$  T cells in the total isolated brain cell population is indicated. (C) The expansion of 2D2 T cells treated with anti-Sema6D Ab was compared for three independent experiments in relation to a control group. (D) The percentage of 2D2 Tg T cells in the periphery was unaffected by anti-Sema6D antibody treatment. Flow cytometry detection of  $CD4^+$   $V\beta 11^+$  T cells in the spleen and lymph node 5 days after adoptive transfer is shown.
